# Supplementary material
Source: PubMed Central journal article supplement (PMC4815104)
Supplement: supp_tpc.15.00172_TPC2015-00172-RAR2_Supplemental_Data.pdf [file supp_tpc.15.00172_TPC2015-00172-RAR2_Supplemental_Data.pdf]

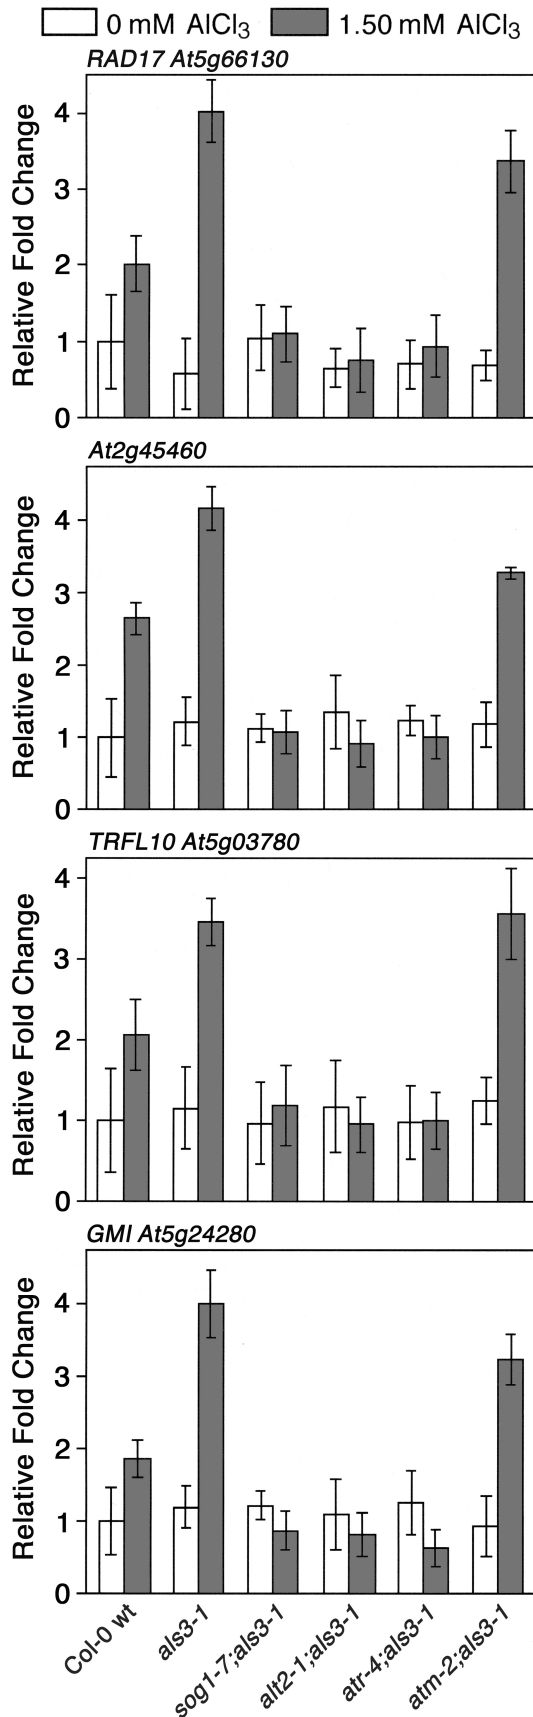**Supplemental Figure 1.** Al-responsive

expression of DNA damage response genes is largely independent of ATM.

Seedlings of Col-0 wt, *als3-1*, *sog1-7;als3-1*, *alt2-1;als3-1*, *atr-4;als3-1*, and *atm-2;als3-1* were grown in the absence or presence of 1.50 mM AlCl<sub>3</sub> (pH 4.2) in a soaked gel environment for 3 d after which tissue was collected for RNA isolation. Following cDNA synthesis, real-time PCR was performed to examine expression patterns for a group of previously documented SOG1-regulated genes (Yoshiyama et al., 2009). Mean  $\pm$ SD values were determined from three technical replicates.

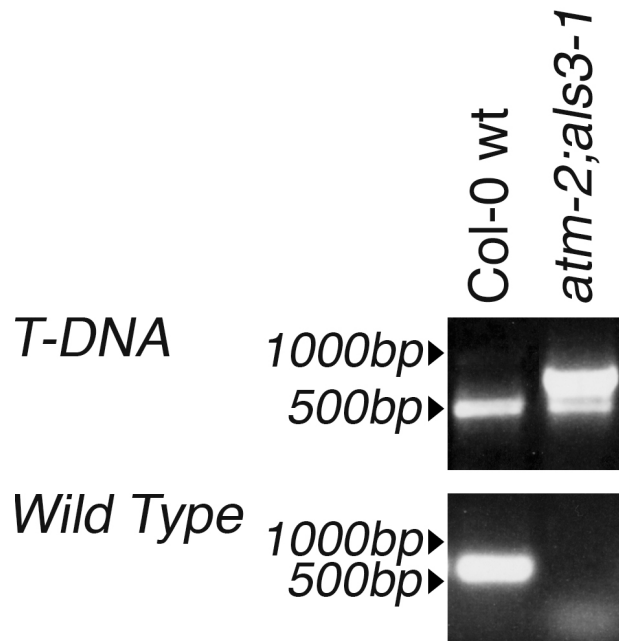

**Supplemental Figure 2.** *atm-2* genotype analysis for generation of an *atm-2;als3-1* double mutant.

DNA was isolated from the leaves of the F<sub>2</sub> progeny of *als3-1* x *atm-2* and then analyzed by PCR as follows: one repeat of 30 sec at 94°C, and then 40 repeats of 30 sec at 94°C, 30 sec at 55°C, and 30 sec at 72°C. Amplicons were subsequently analyzed by running out on a 1% agarose gel visualized with ethidium bromide under UV light. The T-DNA band amplified with *At3g48190* 3' reverse and T-DNA primers is predicted to result in an amplicon of 680 bp whereas the band resulting from amplification with the *At3g48190* 5' forward and 3' reverse primers is expected to result in a product that is 598 bp (see Supplemental Table 1 for WT and T-DNA primer sequences).

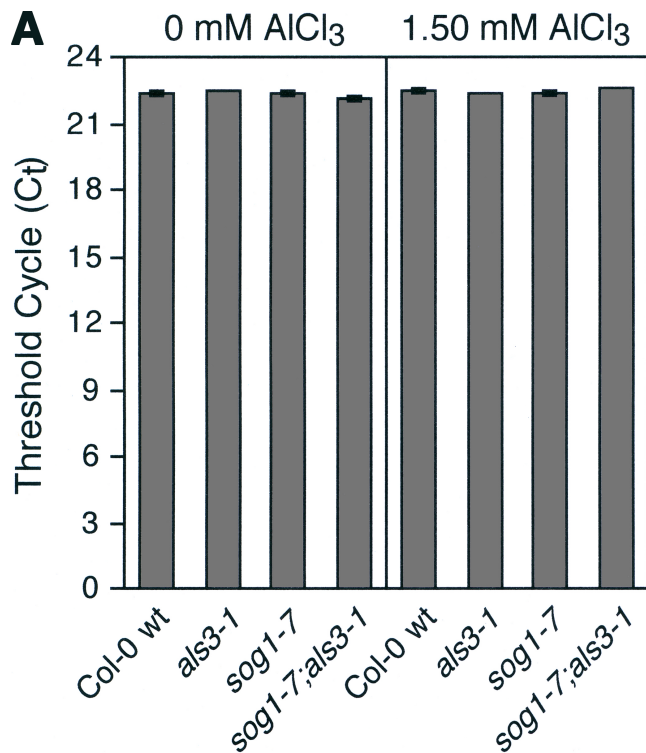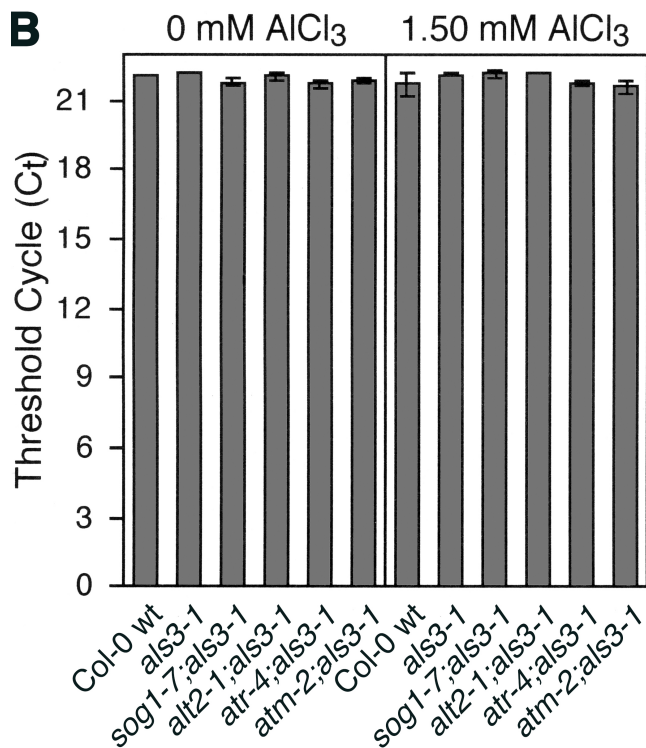

**Supplemental Figure 3.**

Expression analysis of reference gene, *EF1a*. **A)** Seedlings of Col-0 wt, *als3-1*, *sog1-7* and *sog1-7;als3-1* were grown for 3 d with 0 or 1.50 mM AlCl<sub>3</sub> (pH 4.2), after which tissue was harvested for RNA isolation. Following cDNA synthesis, real-time PCR was performed and Ct values were compared to check for equivalent expression across all genotypes in the presence and absence of Al. **B)** Seedlings of Col-0 wt, *als3-1*, *sog1-7;als3-1*, *alt2-1;als3-1*, *atr-4;als3-1*, and *atm-2;als3-1* were grown in the absence or presence of 1.50mM AlCl<sub>3</sub> (pH 4.2) in a soaked gel environment for 3d after which tissue was collected for RNA isolation. Following cDNA synthesis, real-time PCR was performed and Ct values were compared to check for equivalent expression across all genotypes in the presence and absence of Al. For both analyses, mean  $\pm$ SD values were determined from three technical replicates.

**Supplemental Table 1. Primer Sequences.**

| <b>TAIR #</b>    | <b>Gene Name</b> | <b>Direction</b> | <b>Sequence (5' to 3')</b> | <b>Purpose</b> |
|------------------|------------------|------------------|----------------------------|----------------|
| <i>AT5G60390</i> | <i>EF-1A</i>     | 5'<br>FORWARD    | TGAGCACGCTCTTCTTGCTTTCA    | RT-PCR         |
| <i>AT5G60390</i> | <i>EF-1A</i>     | 3'<br>REVERSE    | GGTGGTGGCATCCATCTTGTTACA   | RT-PCR         |
| <i>AT1G25580</i> | <i>SOG1</i>      | 5'<br>FORWARD    | TCTCTTGGGATCACAGGACAG      | RT-PCR         |
| <i>AT1G25580</i> | <i>SOG1</i>      | 3'<br>REVERSE    | CAAGGTCTTAAGCTCGTGGTAG     | RT-PCR         |
| <i>AT4G21070</i> | <i>BRCA1</i>     | 5'<br>FORWARD    | GAGCCATATGAGATCACTATG      | RT-PCR         |
| <i>AT4G21070</i> | <i>BRCA1</i>     | 3'<br>REVERSE    | ATCCTACAAACAAGTAACAAC      | RT-PCR         |
| <i>AT2G18600</i> |                  | 5'<br>FORWARD    | ATCTAGAAGGAAACGTCTGTG      | RT-PCR         |
| <i>AT2G18600</i> |                  | 3'<br>REVERSE    | TCTCAATGTACAAGAGTAGAC      | RT-PCR         |
| <i>AT5G24280</i> | <i>GMI1</i>      | 5'<br>FORWARD    | TTGGTGTGCAAATCATCACAG      | RT-PCR         |
| <i>AT5G24280</i> | <i>GMI1</i>      | 3'<br>REVERSE    | CACCAACCTGCGCAACGAACG      | RT-PCR         |
| <i>AT5G20850</i> | <i>RAD51</i>     | 5'<br>FORWARD    | CTACCGCTCTCTACAGAACAG      | RT-PCR         |
| <i>AT5G20850</i> | <i>RAD51</i>     | 3'<br>REVERSE    | GCAGAGAGAAGCAAGGCATTG      | RT-PCR         |
| <i>AT5G03780</i> | <i>TRFL10</i>    | 5'<br>FORWARD    | CAGGTAACCTTCATCGGTTCAAG    | RT-PCR         |
| <i>AT5G03780</i> | <i>TRFL10</i>    | 3'<br>REVERSE    | GTTCAACCAAGTCTGGCTTCATC    | RT-PCR         |
| <i>AT2G45460</i> |                  | 5'<br>FORWARD    | GATAAAACATGGTACTCGTTC      | RT-PCR         |
| <i>AT2G45460</i> |                  | 3'<br>REVERSE    | GTGTGCGAATACAAAACAAAG      | RT-PCR         |
| <i>AT2G30250</i> | <i>WRKY25</i>    | 5'<br>FORWARD    | GTATGGTGAGATAGATGAAGAG     | RT-PCR         |
| <i>AT2G30250</i> | <i>WRKY25</i>    | 3'<br>REVERSE    | CATATTACTAGTGACTAAGTC      | RT-PCR         |
| <i>AT1G17460</i> | <i>TRFL3</i>     | 5'               | CTTGGACTATCTCTGAAGTTG      | RT-PCR         |

|                  |                    | FORWARD |         |                          |                    |
|------------------|--------------------|---------|---------|--------------------------|--------------------|
| <i>AT1G17460</i> | <i>TRFL3</i>       | 3'      | REVERSE | ACAGAGAAGTTAACCTCACAG    | RT-PCR             |
| <i>AT5G66130</i> | <i>RAD17</i>       | 5'      | FORWARD | AGAGGATGTTCCACAGTCAG     | RT-PCR             |
| <i>AT5G66130</i> | <i>RAD17</i>       | 3'      | REVERSE | GTTGTAACTATCATACCAG      | RT-PCR             |
| <i>AT5G64060</i> | <i>ANAC10</i><br>3 | 5'      | FORWARD | CTCAAGTATCTCTCGATGGTG    | RT-PCR             |
| <i>AT5G64060</i> | <i>ANAC10</i><br>3 | 3'      | REVERSE | CCAAAGCAAGAAAGAGCATAAG   | RT-PCR             |
| <i>AT5G48720</i> | <i>XRI1</i>        | 5'      | FORWARD | GAATGTGCCACCAGAAACAGAG   | RT-PCR             |
| <i>AT5G48720</i> | <i>XRI1</i>        | 3'      | REVERSE | CTATCAGCTTATTACTACTTAC   | RT-PCR             |
| <i>AT5G60250</i> |                    | 5'      | FORWARD | GAATGATCGTAATCCTGAAGAG   | RT-PCR             |
| <i>AT5G60250</i> |                    | 3'      | REVERSE | CAGTCTTATATAGAACAATAC    | RT-PCR             |
| <i>AT3G07800</i> | <i>TK1A</i>        | 5'      | FORWARD | CCAATAGCTGATTCTGTGAC     | RT-PCR             |
| <i>AT3G07800</i> | <i>TK1A</i>        | 3'      | REVERSE | GACCAGAGGCTGTAGAGAAAG    | RT-PCR             |
| <i>AT4G02390</i> | <i>PARP2</i>       | 5'      | FORWARD | GTTCCACTTGGCAAACCAGTG    | RT-PCR             |
| <i>AT4G02390</i> | <i>PARP2</i>       | 3'      | REVERSE | GAAGGAGTTTGAAAGAAATAC    | RT-PCR             |
| <i>AT4G37490</i> | <i>CYCB1;1</i>     | 5'      | FORWARD | CAGCACTCTCAAGCATCACAC    | RT-PCR             |
| <i>AT4G37490</i> | <i>CYCB1;1</i>     | 3'      | REVERSE | CTAGGCTTGGTTCTTCAGCTTC   | RT-PCR             |
| <i>AT5G40840</i> | <i>SYN2</i>        | 5'      | FORWARD | TCAAGATTCTGCTGCTTTGAC    | RT-PCR             |
| <i>AT5G40840</i> | <i>SYN2</i>        | 3'      | REVERSE | ACTACTTCCTCGTCTAGCTTC    | RT-PCR             |
| <i>AT5G60390</i> |                    | 5'      | FORWARD | TGAGCACGCTCTTCTTGCTTTCA  | RT-PCR             |
| <i>AT5G60390</i> |                    | 3'      | REVERSE | GGTGGTGGCATCCATCTTGTTACA | RT-PCR             |
| <i>AT1G25580</i> | <i>sog1-7</i>      | 5'      | FORWARD | CAGAGACTTCCTGTTTCAG      | CAPS<br>Genotyping |
| <i>AT1G25580</i> | <i>sog1-7</i>      | 3'      | REVERSE | CAATCAAAGCTTATAGCACAG    | CAPS<br>Genotyping |

|                  |               |               |                                                   |                             |
|------------------|---------------|---------------|---------------------------------------------------|-----------------------------|
| <i>AT5G40820</i> | <i>atr-4</i>  | 5'<br>FORWARD | CCTTCCTTCTCTTTCTCTAAGAAG                          | CAPS<br>Genotyping          |
| <i>AT5G40820</i> | <i>atr-4</i>  | 3'<br>REVERSE | TTCTTCGGTTCAGTTGTATCTG                            | CAPS<br>Genotyping          |
| <i>AT2G37330</i> | <i>als3-1</i> | 5'<br>FORWARD | CTCTCGTTATCGGATTTGTTT                             | CAPS<br>Genotyping          |
| <i>AT2G37330</i> | <i>als3-1</i> | 3'<br>REVERSE | GACAGAGAGATCACTAGTGC                              | CAPS<br>Genotyping          |
| TDNA             | SALK LB       | Left Border   | TGGTTCACGTAGTGGGCCATCG                            | T-DNA<br>Genotyping         |
| <i>AT3G48190</i> | <i>atm-2</i>  | 5'<br>FORWARD | TGCATTGGTTTTCGCTTATCA                             | WT<br>Genotyping            |
| <i>AT3G48190</i> | <i>atm-2</i>  | 3'<br>REVERSE | CAAGCTTGATGTAGATATCTAC                            | WT<br>Genotyping            |
| <i>AT1G25580</i> | <i>SOG1</i>   | 5'<br>FORWARD | GGAAGGATTTCAATGGCTGGGCGATCAT<br>GGCTG             | WT MBP<br>fusion            |
| <i>AT1G25580</i> | <i>SOG1</i>   | 3'<br>REVERSE | ATCTAGATCAGTCTTTCCAGTCCC                          | WT MBP<br>fusion            |
| <i>AT1G25580</i> | <i>SOG1</i>   | 5'<br>FORWARD | GTGCGCTGGCATAAGACAAGAAGAACG<br>AAACCGGTTG         | <i>sog1-1</i><br>MBP fusion |
| <i>AT1G25580</i> | <i>SOG1</i>   | 3'<br>REVERSE | CAACCGGTTTCGTTCTTCTTGTCTTATGC<br>CAGCGCAC         | <i>sog1-1</i><br>MBP fusion |
| <i>AT1G25580</i> | <i>SOG1</i>   | 5'<br>FORWARD | AAGGAAGGTGATTATGTTGTTTTTAAGAT<br>TTTCTACCAGCAGCCA | <i>sog1-7</i><br>MBP fusion |
| <i>AT1G25580</i> | <i>SOG1</i>   | 3'<br>REVERSE | TGGCTGCTGGTAGAAAATCTTAAAAACA<br>ACATAATCACCTTCCTT | <i>sog1-7</i><br>MBP fusion |
| <i>AT4G21070</i> | <i>BRCA1</i>  | 5'<br>FORWARD | AAAGATTGGTGCTTTGACATTG                            | <i>BRCA1</i><br>promoter    |
| <i>AT4G21070</i> | <i>BRCA1</i>  | 3'<br>REVERSE | TTTCGATCTTCACTCAGAGAAAAC                          | <i>BRCA1</i><br>promoter    |
| <i>AT5G40820</i> | <i>ATR</i>    | 5'<br>FORWARD | GCGGCCGCATGGCGAAGGACGACAATA<br>ATC                | ATR GST<br>fusion           |
| <i>AT5G40820</i> | <i>ATR</i>    | 3'<br>REVERSE | GCGGCCGCTCAGAACCAGGGCATCCAC<br>CAG                | ATR GST<br>fusion           |

**Supplemental Table 2.** Mutant genotyping methods and sources.

| <b>Mutation Name</b> | <b>Method for Genotyping</b>                         | <b>Source</b>                                      |
|----------------------|------------------------------------------------------|----------------------------------------------------|
| <i>als3-1</i>        | CAPS PCR followed by ClaI restriction enzyme digest  | Larsen et al. 2005                                 |
| <i>sog1-7</i>        | CAPS PCR followed by DdeI restriction enzyme digest  | This paper                                         |
| <i>atr-4</i>         | CAPS PCR followed by BstXI restriction enzyme digest | Rounds et al. 2008                                 |
| <i>alt2-1</i>        | Sanger sequence confirmation                         | Nezames et al. 2012<br>ARBC seed stock/ this paper |
| <i>atm-2</i>         | TDNA and WT PCR                                      | Dr. Holger Puchta                                  |
| <i>brca1-1</i>       | Refer to source                                      | Dr. Holger Puchta                                  |
| <i>brca1-3</i>       | Refer to source                                      | Dr. Holger Puchta                                  |
| <i>parp1</i>         |                                                      | Dr. Sylvia de Pater/Jia et al. 2013                |
| <i>parp2</i>         | Refer to source                                      |                                                    |
| <i>parp1</i>         |                                                      |                                                    |
| <i>parp2</i>         |                                                      | Dr. Sylvia de Pater/Jia et al. 2013                |
| <i>KU80</i>          | Refer to source                                      | et al. 2013                                        |

**Supplemental Table 2.** Amplification efficiencies of RT PCR primers.

| <b>Gene Name</b> | <b>TAIR #</b>    | <b>PCR Efficiency (E)</b> | <b>% Efficiency</b> | <b>Standard Curve R<sup>2</sup></b> |
|------------------|------------------|---------------------------|---------------------|-------------------------------------|
|                  | <i>AT2G18600</i> | 2.030607799               | 103.0607799         | 0.99786                             |
|                  | <i>AT2G45460</i> | 2.031139033               | 103.1139033         | 0.99811                             |
|                  | <i>AT5G60250</i> | 1.992759976               | 99.27599759         | 0.98949                             |
| <i>ANAC103</i>   | <i>AT5G64060</i> | 2.043687098               | 104.3687098         | 0.9944                              |
| <i>BRCA1</i>     | <i>AT4G21070</i> | 2.017022902               | 101.7022902         | 0.99171                             |
| <i>CYCB1;1</i>   | <i>AT4G37490</i> | 2.028091671               | 102.8091671         | 0.99937                             |
| <i>EF-1A</i>     | <i>AT5G60390</i> | 2.019313383               | 101.9313383         | 0.99802                             |
| <i>GMI1</i>      | <i>AT5G24280</i> | 2.006901663               | 100.6901663         | 0.9969                              |
| <i>PARP2</i>     | <i>AT4G02390</i> | 1.977080681               | 97.70806809         | 0.99721                             |
| <i>RAD17</i>     | <i>AT5G66130</i> | 1.995358804               | 99.53588035         | 0.999                               |
| <i>RAD51</i>     | <i>AT5G20850</i> | 2.016376466               | 101.6376466         | 0.99757                             |
| <i>SOG1</i>      | <i>AT1G25580</i> | 2.000721667               | 100.0721667         | 0.99479                             |
| <i>SYN2</i>      | <i>AT5G40840</i> | 2.013113414               | 101.3113414         | 0.99618                             |
| <i>TK1A</i>      | <i>AT3G07800</i> | 1.967949173               | 96.79491726         | 0.99398                             |
| <i>TRFL10</i>    | <i>AT5G03780</i> | 1.99214315                | 99.21431497         | 0.99875                             |
| <i>TRFL3</i>     | <i>AT1G17460</i> | 2.016075069               | 101.6075069         | 0.99957                             |
| <i>WRKY25</i>    | <i>AT2G30250</i> | 1.995152065               | 99.51520646         | 0.99486                             |
| <i>XRI1</i>      | <i>AT5G48720</i> | 1.987031752               | 98.70317522         | 0.99806                             |
